# Supplementary material for: Astrovirus Infection in Cattle with Nonsuppurative Meningoencephalitis in South Korea
Source: MDPI journal article supplement (doi:10.3390/v13101941), 2021-09-28
Supplement: s1 [file s1]

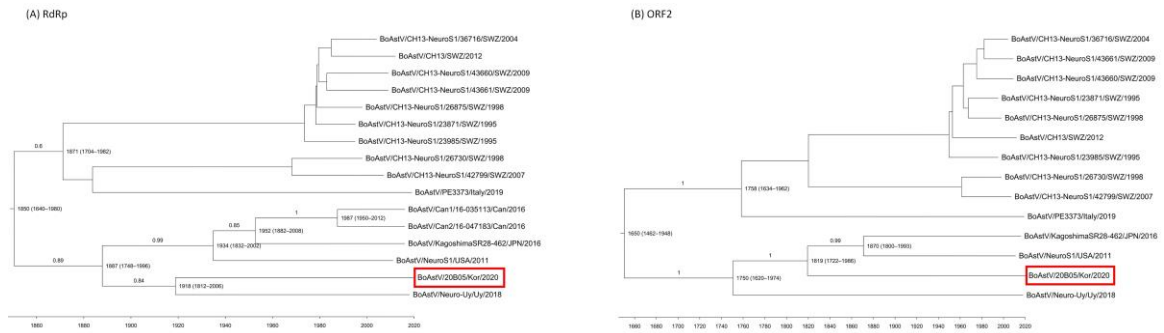

**Figure S1.** Maximum clade credibility trees obtained by analysis of partial RdRp and ORF2 sequences of BoAstV 20B05.
